# Supplementary material for: Spatial consistency and bias in avalanche forecasts – a case study in the European Alps
Source: Copernicus journal article supplement (doi:10.5194/nhess-18-2697-2018), 2018-10-23
Supplement: Supplementary file 1 [file nhess-18-2697-2018-supplement.zip]

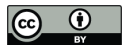

## *Supplement of*

# **Spatial consistency and bias in avalanche forecasts – a case study in the European Alps**

**Frank Techel et al.**

*Correspondence to:* Frank Techel (techel@slf.ch)

- nhess-18-2697-2018-supplement-title-page.pdf
- supplement\_1.pdf
- supplement\_2.pdf

The copyright of individual parts of the supplement might differ from the CC BY 4.0 License.
