# Supplementary material for: Spatial consistency and bias in avalanche forecasts – a case study in the European Alps
Source: Copernicus journal article supplement (doi:10.5194/nhess-18-2697-2018), 2018-10-23
Supplement: Supplementary file 2 [file nhess-18-2697-2018-supplement.zip]

# Supplement 2 to: Spatial consistency and bias in avalanche forecasts - a case study in the European Alps

Frank Techel et al.

## 1 Sensitivity analysis - removing individual years from the data set

Danger level  $D \geq 4$ :

Using  $D_{\text{morning}}$  instead of  $D_{\text{max}}$  decreased  $P_{\text{v.crit}}$  (median change from 2.5% to 2.1%), but resulted in more or less the same order of the warning regions ( $\rho = 0.94$ ), and the same regions with the highest values ( $P_{\text{v.crit}} \geq 7\%$ ,  $\text{max} = 12.2\%$ ). For the warning  
5 region with the highest values of  $P_{\text{v.crit}}$ , using  $D_{\text{morning}}$  rather than  $D_{\text{max}}$ , resulted sometimes in markedly lower values ( $\Delta P_{\text{v.crit}}$  1 to 3%), with especially large differences observed in Piemonte (PIE,  $\Delta P_{\text{v.crit}} = 4.7\%$ ).

Removing the winter 2013/2014 from the data set had the greatest impact on both the absolute values of  $P_{\text{v.crit}}$  as well as the rank order. The largest changes in  $P_{\text{v.crit}}$  were noted when comparing a data set excluding 2013/2014 and one excluding 2011/2012 ( $\rho = 0.59$ ). However, six of the ten regions with the highest values of  $P_{\text{v.crit}}$  remained the same even for those subsets  
10 (all belonging to Briançon (BRI)).

Danger level  $D = 1$ :

Using  $D_{\text{morning}}$  instead of  $D_{\text{max}}$  resulted in a reduction of the number of forecasts with  $D = 1$ , but the rank order of the warning regions changed only marginally ( $\rho = 0.90$ ). The rank order correlation was most sensitive to removing the 2011/2012 winter,  
15 and was lowest when comparing subsets of the data either excluding the 2011/2012 or the 2013/2014 winter. However, even then the correlation was strong ( $\rho = 0.80$ ).

Danger level  $D = 3$ :

The rank order correlations were most sensitive to removing the 2013/2014 winter. However, even then the correlations were  
20 generally strong or very strong ( $P_{D=3}$ :  $\rho = 0.84$ ,  $L_{D=3}$ :  $\rho = 0.71$ ).
